# Supplementary material
Source: PubMed Central journal article supplement (PMC6166210)
Supplement: kwy117_pettee_gabriel_web_material_final.pdf [file kwy117_pettee_gabriel_web_material_final.pdf]

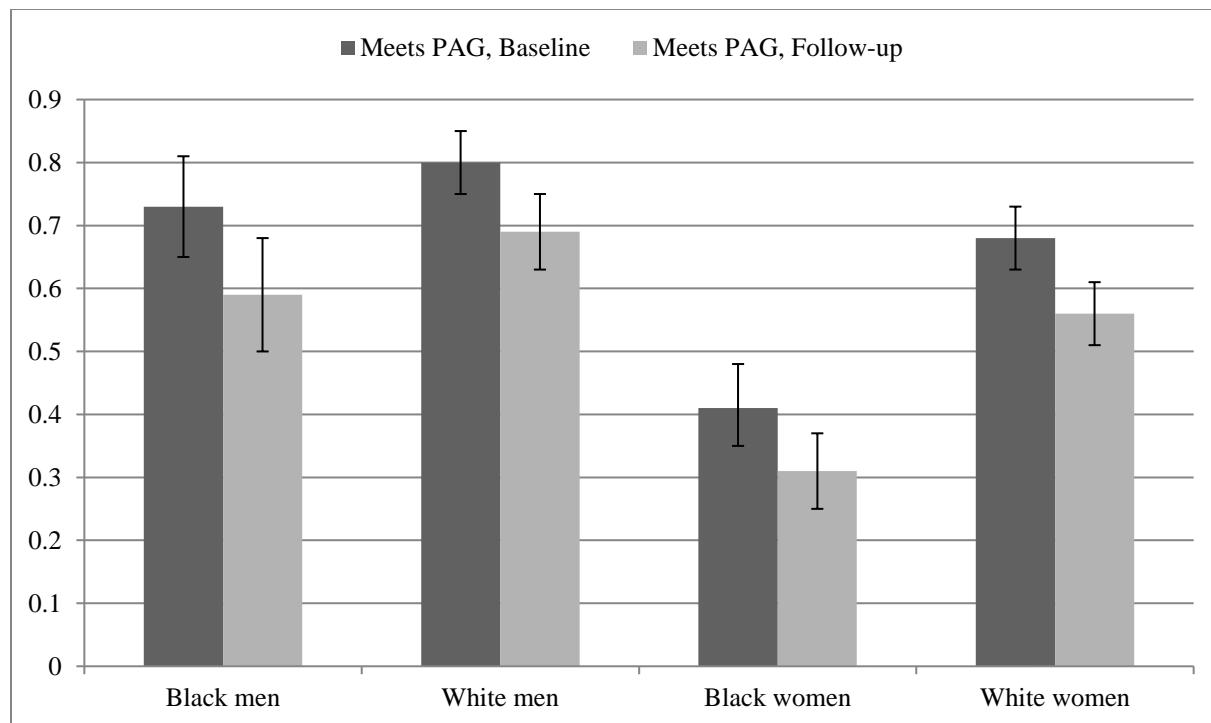

**Web Figure 1.** The prevalence (with 95% confidence limits) of meeting *2008 Physical Activity Guidelines (PAG) for Americans (1)* by race/sex group at Baseline (2005-06) and 10-Year Follow-up (2015-16) (n=962).

**Web Table 1.** Baseline (2005-06), 10-year follow-up (2015-16), and 10-year change accelerometer-determined physical activity and sedentary behavior estimates within and stratified by baseline age and cardiorespiratory fitness groups in the Coronary Artery Risk Development in Young Adults (CARDIA) study (n=962).

| Variable                                                  | Baseline Age                          |             |                           |                                       |             |                          |         | Baseline Fitness                                  |             |                           |                                                   |             |                           |                      |
|-----------------------------------------------------------|---------------------------------------|-------------|---------------------------|---------------------------------------|-------------|--------------------------|---------|---------------------------------------------------|-------------|---------------------------|---------------------------------------------------|-------------|---------------------------|----------------------|
|                                                           | <45 years (n = 398; 41.4%), mean (SE) |             |                           | ≥45 years (n = 564; 58.6%), mean (SE) |             |                          | P value | <Median (452 seconds) (n = 493; 51.2%), mean (SE) |             |                           | ≥Median (452 seconds) (n = 469; 48.8%), mean (SE) |             |                           | P value <sup>a</sup> |
|                                                           | BL                                    | F-Up        | 10-Year Δ                 | BL                                    | F-Up        | 10-Year Δ                |         | BL                                                | F-Up        | 10-Year Δ                 | BL                                                | F-Up        | 10-Year Δ                 |                      |
| Wear time, min·d <sup>-1</sup>                            | 888.0 (4.5)                           | 898.1 (4.6) | 10.3 (5.6)                | 898.4 (3.6)                           | 890.8 (3.7) | -7.6 (4.1)               | 0.01    | 884.0 (4.0)                                       | 884.5 (4.2) | 0.5 (4.8)                 | 904.7 (3.9)                                       | 903.9 (3.9) | -0.8 (4.6)                | 0.84                 |
| Total Accelerometer counts, per 10,000 ct·d <sup>-1</sup> | 37.7 (2.9)                            | 28.8 (0.6)  | -8.9 (2.9) <sup>b</sup>   | 33.1 (0.5)                            | 28.7 (0.5)  | -4.5 (0.5) <sup>c</sup>  | 0.14    | 31.2 (1.9)                                        | 24.5 (0.4)  | -6.7 (1.9) <sup>c</sup>   | 39.1 (1.5)                                        | 33.2 (0.6)  | -5.9 (1.5) <sup>c</sup>   | 0.76                 |
| Average accelerometer counts, ct·min·d <sup>-1</sup>      | 411.1 (23.3)                          | 320.6 (6.5) | -90.5 (23.4) <sup>c</sup> | 368.6 (5.6)                           | 320.8 (5.5) | -47.8 (5.2) <sup>c</sup> | 0.08    | 346.8 (15.9)                                      | 277.6 (4.8) | -69.2 (16.1) <sup>c</sup> | 427.6 (12.3)                                      | 366.1 (6.4) | -61.5 (12.2) <sup>c</sup> | 0.70                 |
| Sedentary time, min·d <sup>-1</sup>                       | 482.8 (5.3)                           | 532.9 (5.3) | 50.1 (6.0) <sup>c</sup>   | 504.2 (4.1)                           | 533.5 (4.3) | 29.3 (4.5) <sup>c</sup>  | 0.006   | 491.7 (4.6)                                       | 535.7 (4.8) | 43.9 (5.0) <sup>c</sup>   | 499.2 (4.7)                                       | 530.7 (4.6) | 31.5 (5.3) <sup>c</sup>   | 0.08                 |
| Light intensity PA, min·d <sup>-1</sup>                   | 367.7 (4.1)                           | 336.6 (4.3) | -31.1 (4.2) <sup>c</sup>  | 358.2 (3.6)                           | 327.9 (3.5) | -30.2 (3.6) <sup>c</sup> | 0.88    | 364.0 (3.8)                                       | 328.9 (3.8) | -35.1 (4.1) <sup>c</sup>  | 360.1 (3.8)                                       | 334.3 (3.9) | -25.8 (3.6) <sup>c</sup>  | 0.09                 |
| MVPA, min·d <sup>-1</sup>                                 | 37.6 (1.5)                            | 28.9 (1.2)  | -8.7 (1.4) <sup>c</sup>   | 36.0 (1.0)                            | 29.4 (1.0)  | -6.6 (0.9) <sup>c</sup>  | 0.22    | 28.3 (1.1)                                        | 19.9 (0.8)  | -8.4 (1.1) <sup>c</sup>   | 45.4 (1.2)                                        | 38.9 (1.2)  | -6.5 (1.2) <sup>c</sup>   | 0.23                 |
| MVPA in bouts, min·d <sup>-1 d</sup>                      | 12.3 (1.0)                            | 13.2 (0.9)  | 0.9 (1.1)                 | 12.6 (0.7)                            | 15.8 (0.8)  | 3.2 (0.8) <sup>c</sup>   | 0.09    | 8.2 (0.7)                                         | 8.5 (0.6)   | 0.4 (0.8)                 | 17.0 (0.9)                                        | 21.3 (1.0)  | 4.3 (1.1) <sup>c</sup>    | 0.003                |

Footnotes: SE = standard error; BL = baseline; F-Up = follow-up;  $\Delta$  = change;  $\text{min}\cdot\text{d}^{-1}$ =minutes per day;  $\text{ct}\cdot\text{d}^{-1}$ =counts per day;  $\text{ct}\cdot\text{min}\cdot\text{d}^{-1}$ =counts per minute per day; MVPA = moderate to vigorous intensity physical activity; EU = exercise units. <sup>a</sup> = *P* value for differences by age (<45 years versus  $\geq$ 45 years) and cardiorespiratory fitness (<452 seconds versus  $\geq$ 452 seconds) groups based on Student t-tests; <sup>b</sup> = *P*<0.01; <sup>c</sup>=*P*<0.001; <sup>d</sup>=  $\geq$ 8 of 10 consecutive minutes above 1952  $\text{ct}\cdot\text{min}^{-1}$  threshold.
